# Supplementary material for: Highly dispersed secondary building unit-stabilized binary metal center on a hierarchical porous carbon matrix for enhanced oxygen evolution reaction
Source: Royal Society of Chemistry journal article supplement (doi:10.1039/d0nr05941b), 2020-11-10
Supplement: d0nr05941b1.pdf [file d0nr05941b1.pdf]

## Supporting Information

# Highly dispersed secondary building unit-stabilized binary metal center on hierarchical porous carbon matrix for enhanced oxygen evolution reaction

Lu Meng,<sup>a</sup> Ling Zhang,<sup>a</sup> Hongliang Jiang,<sup>b</sup> Yusuf Valentino Kaneti,<sup>c</sup> Jongbeom Na,<sup>d</sup> Yusuke Yamauchi,<sup>\*d</sup> Dmitri Golberg,<sup>c,e</sup> Hao Jiang,<sup>a</sup> Yihua Zhu,<sup>\*a</sup> and Chunzhong Li<sup>\*ab</sup>

<sup>a</sup> Key Laboratory for Ultrafine Materials of Ministry of Education, Shanghai Engineering Research Center of Hierarchical Nanomaterials, School of Materials Science and Engineering, East China University of Science and Technology, Shanghai 200237, China.  
yhuzhu@ecust.edu.cn

<sup>b</sup> School of Chemical Engineering, East China University of Science and Technology, Shanghai 200237, China. czli@ecust.edu.cn

<sup>c</sup> International Center for Materials Nanoarchitectonics (WPI-MANA), National Institute for Materials Science (NIMS), 1-1 Namiki, Tsukuba, Ibaraki 305-0044, Japan.

<sup>d</sup> School of Chemical Engineering and Australian Institute for Bioengineering and Nanotechnology (AIBN), The University of Queensland, Brisbane, QLD, 4072, Australia.  
y.yamauchi@uq.edu.au

<sup>e</sup> School of Chemistry, Physics, and Mechanical Engineering, Science and Engineering Faculty, Queensland University of Technology, Brisbane, QLD 4000, Australia

\* Email: yhuzhu@ecust.edu.cn (Prof. Y. H. Zhu); czli@ecust.edu.cn (Prof. C. Z. Li); y.yamauchi@uq.edu.au (Prof. Y. Yamauchi)

\*Author(s) to whom correspondence should be addressed.

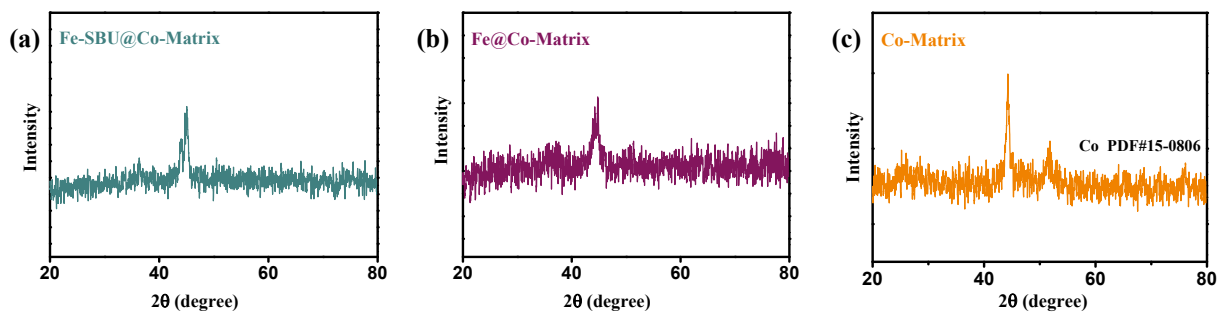

**Fig. S1** XRD patterns of (a) Fe-SBU@Co-Matrix, (b) Fe@Co-Matrix, and (c) Co-Matrix with the corresponding PDF cards.

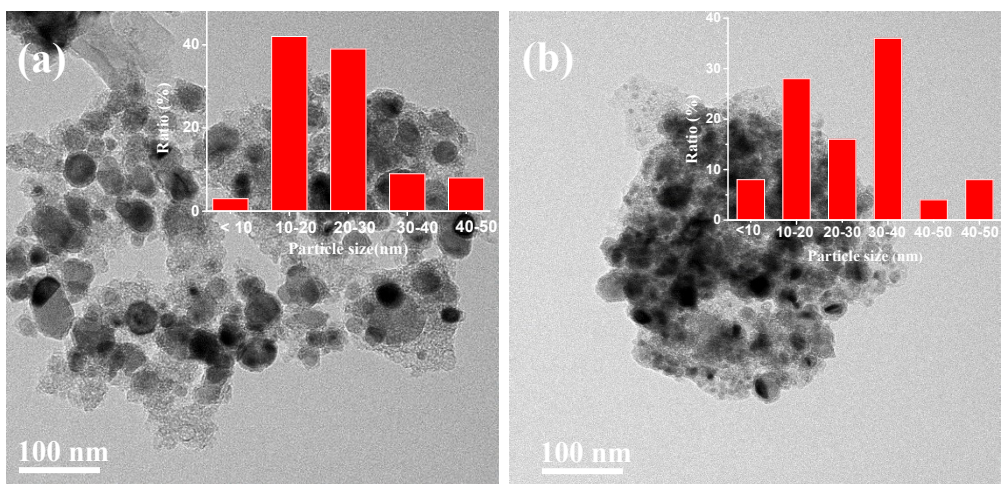

**Fig. S2** TEM images of Fe-SBU@Co-Matrix (a) and Fe@Co-Matrix (b).

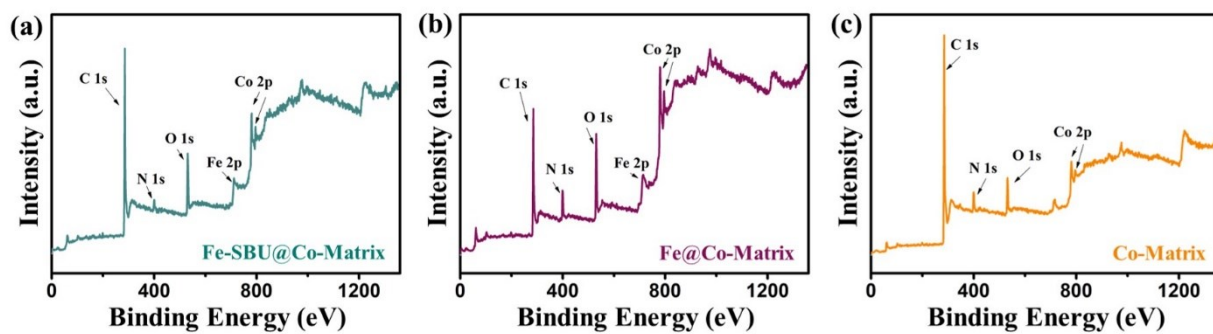

**Fig. S3** XPS survey spectra of (a) Fe-SBU@Co-Matrix, (b) Fe@Co-Matrix, and (c) Co-Matrix.

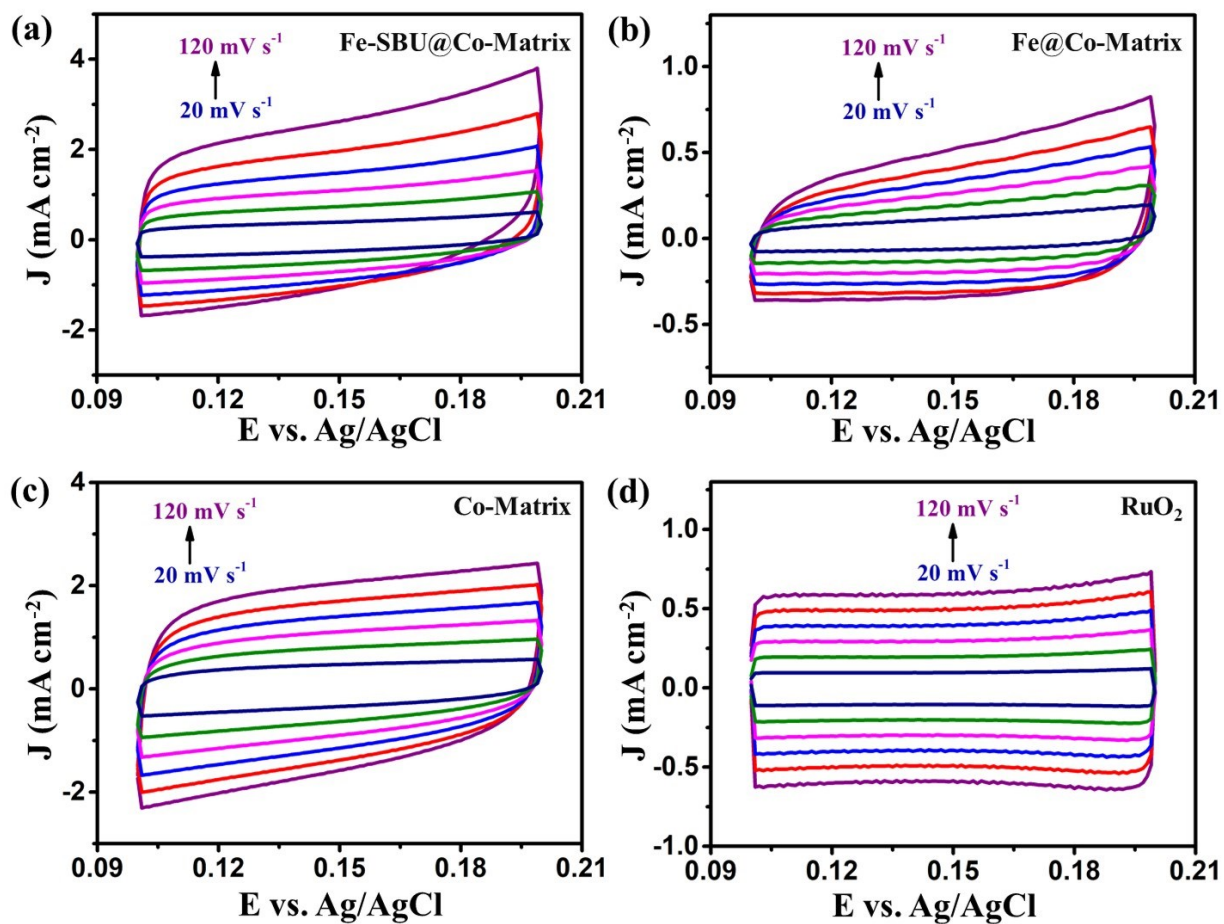

**Fig. S4** Cyclic voltammogram (CV) curves of (a) Fe-SBU@Co-Matrix, (b) Fe@Co-Matrix, (c) Co-Matrix, and (d) RuO<sub>2</sub>.

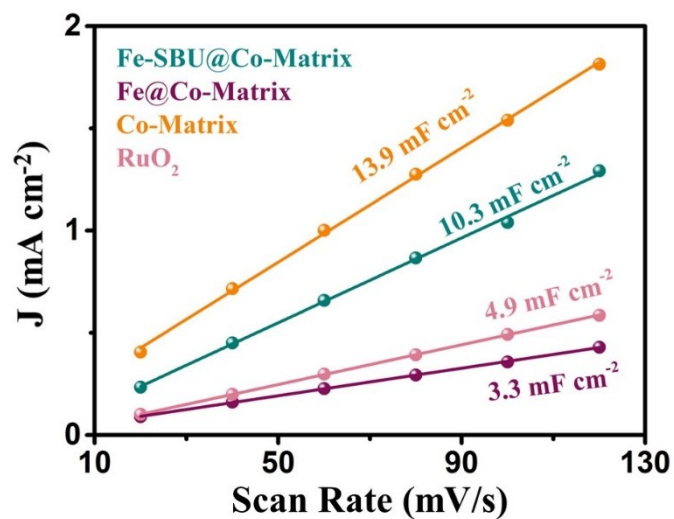

**Fig. S5** Capacitive currents as a function of sweep rate of Fe-SBU@Co-Matrix, Fe@Co-Matrix, Co-Matrix, and RuO<sub>2</sub> electrodes measured at 0.15 V. The double-layer capacitances are calculated from the slope of the linear fitting to the data.

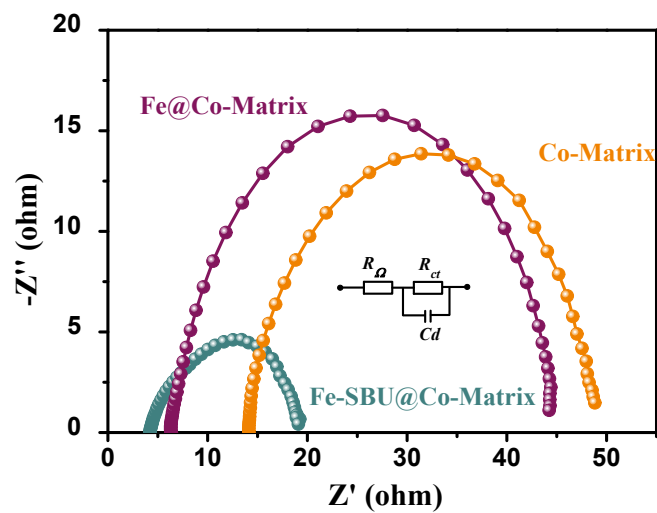

**Fig. S6** The electrochemical impedance (EIS) spectra and equivalent electrical circuit fitting Nyquist plots.

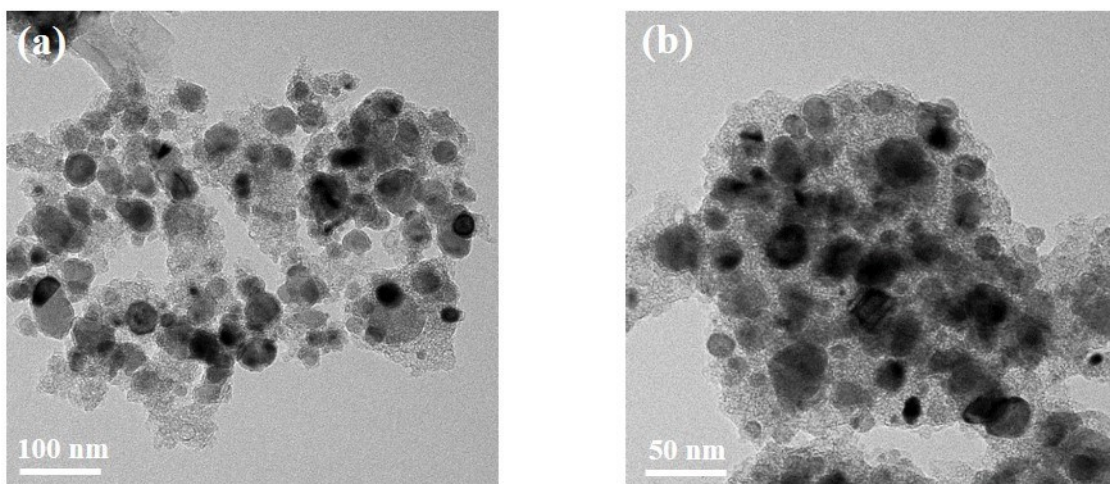

**Fig. S7** TEM pictures of Fe-SBU@Co-Matrix before (a) and after (b) the OER stability test.



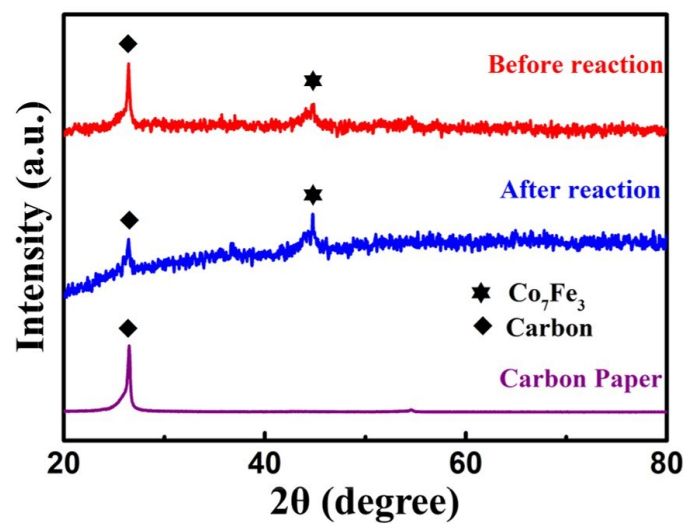

**Fig. S8** XRD patterns of Fe-SBU@Co-Matrix before and after the OER stability test for 40 h in 1.0 M KOH.

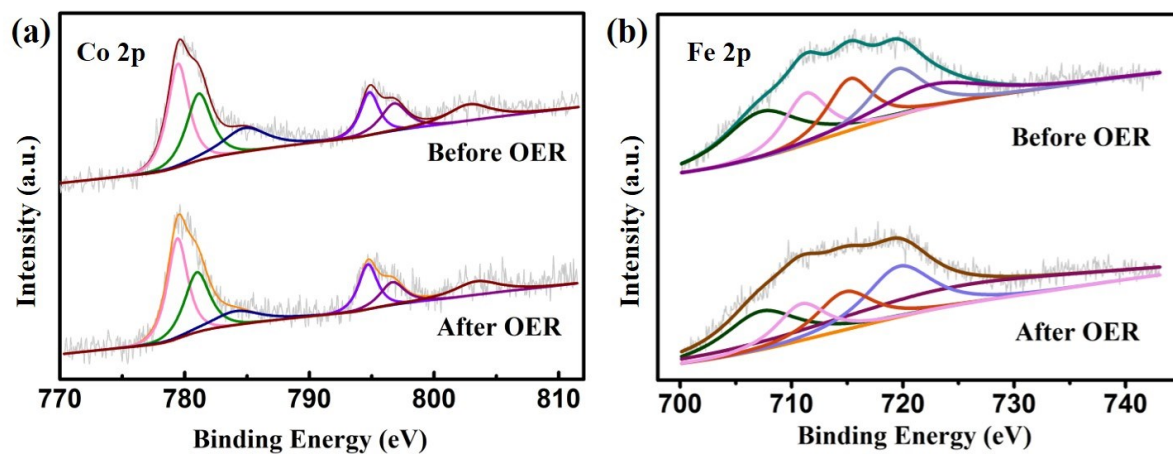

**Fig. S9** High-resolution XPS spectra of Fe-SBU@Co-Matrix before and after the OER stability test for 40 h in 1.0 M KOH: (a) Co 2p and (b) Fe 2p

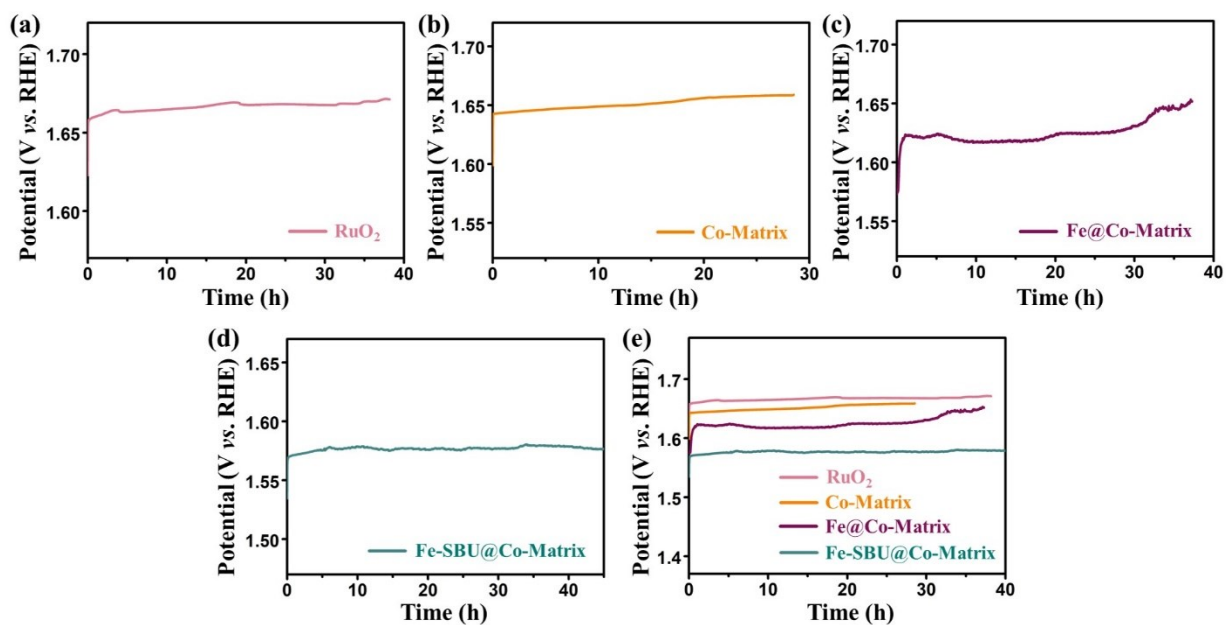

**Fig. S10** Electrochemical stability tests of Fe-SBU@Co-Matrix, Fe@Co-Matrix, Co-Matrix, and RuO<sub>2</sub> in 1.0 M KOH at 20 mA cm<sup>-2</sup>.

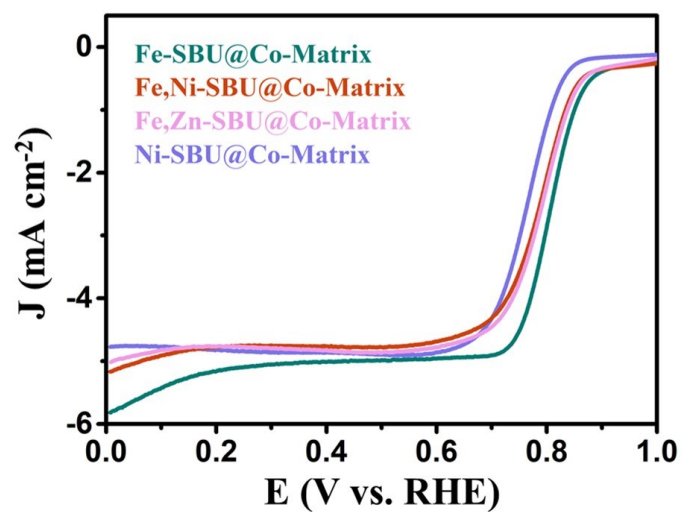

**Fig. S11** Electrochemical performance of Co-Matrix electrocatalysts stabilized with different metal constituents toward ORR in 0.1 M KOH.

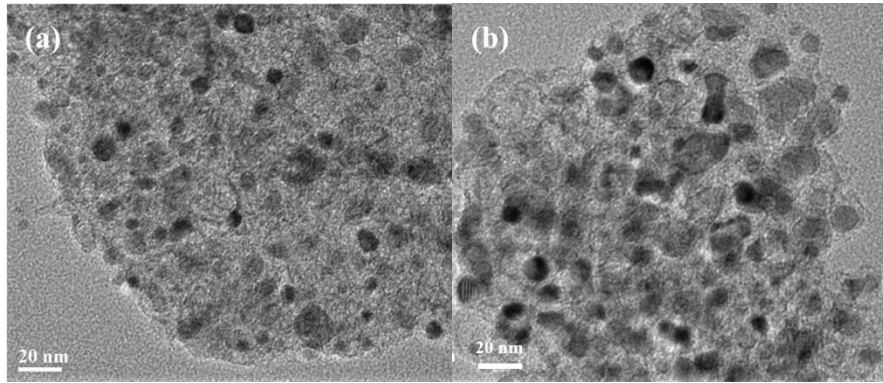

**Fig.S12** TEM after acid etching (a) Fe-SBU@Co-Matrix, (b) Fe@Co-Matrix

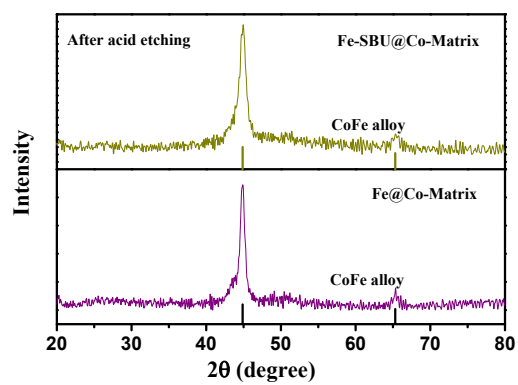

**Fig. S13** XRD patterns after acid etching of Fe-SBU@Co-Matrix and Fe@Co-Matrix

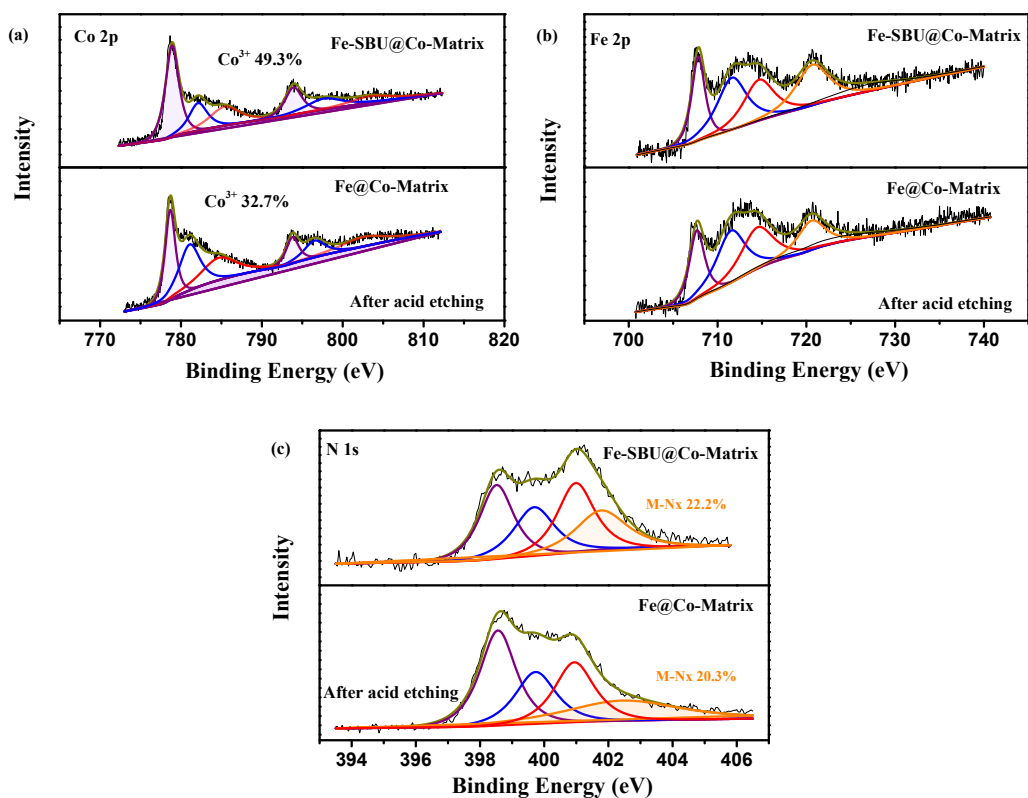

**Fig. S14** XPS spectra after acid etching of Fe-SBU@Co-Matrix and Fe@Co-Matrix (a) Co 2p, (b) Fe 2p, (c) N 1s

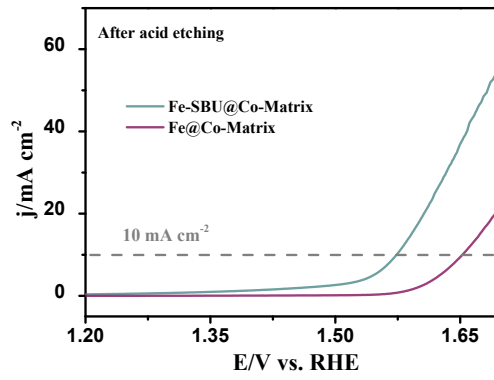

**Fig. S15** Polarization curves of different electrocatalyst at scan rate  $5 \text{ mV s}^{-1}$  of Fe-SBU@Co-Matrix and Fe@Co-Matrix after acid etching.



**Table S1** BET surface area of different catalysts.

| Catalyst         | BET surface area (m <sup>2</sup> /g) |
|------------------|--------------------------------------|
| Fe-SBU@Co-Matrix | 201                                  |
| Fe@Co-Matrix     | 177                                  |
| Co-Matrix        | 263                                  |

**Table S2** The overpotentials and Tafel plots of different electrocatalysts for OER.

| Catalyst         | $\eta_{10}$ (mV) | Tafel slope (mV dec <sup>-1</sup> ) |
|------------------|------------------|-------------------------------------|
| Fe-SBU@Co-Matrix | 250              | 59                                  |
| Fe@Co-Matrix     | 380              | 72                                  |
| Co-Matrix        | 350              | 100                                 |
| RuO <sub>2</sub> | 330              | 77                                  |

**Table S3** Electrochemical performances of Co-Matrix electrocatalysts stabilized with different metal SBUs for OER and ORR

| Catalyst            | $\eta_{10}$ (mV) | Half-wave potential (V) |
|---------------------|------------------|-------------------------|
| Fe-SBU@Co-Matrix    | 250              | 0.81                    |
| Ni-SBU@Co-Matrix    | 336              | 0.76                    |
| Fe,Zn-SBU@Co-Matrix | 291              | 0.79                    |
| Fe,Ni-SBU@Co-Matrix | 297              | 0.79                    |

**Table S4** Comparison of the OER performance of Fe-SBU@Co-Matrix with other reported non-precious metal-based electrocatalysts for OER in alkaline media. Note: All reference electrodes were calibrated to the RHE.  $\eta_{10}$ : overpotential at a current density of 10 mA cm<sup>-2</sup>.

| Catalyst                                                     | $\eta_{10}$ | Loading<br>(mg cm <sup>-2</sup> ) | Tafel<br>(mV dec <sup>-1</sup> ) | Electrolyte | Reference |
|--------------------------------------------------------------|-------------|-----------------------------------|----------------------------------|-------------|-----------|
| Fe-SBU@Co-Matrix                                             | 250         | 0.40                              | 59.0                             | 1.0 M KOH   | This work |
| FeCoNi alloy                                                 | 400         | 1.38                              | 72.0                             | 0.5 M KOH   | 1         |
| Fe-Co-P alloy                                                | 252         | 0.20                              | 33.0                             | 1.0 M KOH   | 2         |
| NiFe-MoO <sub>x</sub>                                        | 276         | 0.20                              | 55.0                             | 1.0 M KOH   | 3         |
| m-NiFe/CN <sub>x</sub>                                       | 220         | 0.51                              | 59.1                             | 0.1 M KOH   | 4         |
| CoFe-MWCNTs                                                  | 300         | 1.00                              | 87.0                             | 1.0 M KOH   | 5         |
| Ni-Co alloy                                                  | 305         | N/A                               | 63.0                             | 1.0 M KOH   | 6         |
| Fe-Ni/NC(1/2)-800                                            | 273         | 0.45                              | 37.8                             | 1.0 M KOH   | 7         |
| FeNi <sub>4,34</sub> @FeNi                                   | 283         | N/A                               | 53.0                             | 1.0 M KOH   | 8         |
| CoFe <sub>2</sub> O <sub>4</sub> /PANI-MWCNT <sub>1:20</sub> | 314         | 0.29                              | 30.7                             | 1.0 M KOH   | 9         |
| CoFe-LDH                                                     | 325         | 0.20                              | 43.0                             | 0.1 M KOH   | 10        |
| M-CoO/CoFe LDHs                                              | 254         | 0.20                              | 34.0                             | 1.0 M KOH   | 11        |
| Co <sub>3</sub> FeS <sub>1.5</sub> (OH) <sub>6</sub>         | 358         | 0.50                              | 79.0                             | 0.1 M KOH   | 12        |
| H <sub>2</sub> O-plasma exfoliated LDHs /NF                  | 232         | 0.40                              | 36.0                             | 1.0 M KOH   | 13        |
| CoFe LDHs-Ar                                                 | 266         | 0.20                              | 37.9                             | 1.0 M KOH   | 14        |
| CoFe-H                                                       | 280         | N/A                               | 28.0                             | 1.0 M KOH   | 15        |
| N-CoFe LDHs                                                  | 281         | 0.20                              | 40.0                             | 1.0 M KOH   | 16        |

## References

1. S. Saha and A. K. Ganguli, *Chemistryselect*, 2017, **2**, 1630-1636.
2. K. W. Liu, C. L. Zhang, Y. D. Sun, G. H. Zhang, X. C. Shen, F. Zou, H. C. Zhang, Z. W. Wu, E. C. Wegener, C. J. Taubert, J. T. Miller, Z. M. Peng and Y. Zhu, *Acs Nano*, 2018, **12**, 158-167.
3. C. Xie, Y. Y. Wang, K. Hu, L. Tao, X. B. Huang, J. Huo and S. Y. Wang, *J Mater Chem A*, 2017, **5**, 87-91.
4. S. Q. Ci, S. Mao, Y. Hou, S. M. Cui, H. Kim, R. Ren, Z. H. Wen and J. H. Chen, *J Mater Chem A*, 2015, **3**, 7986-7993.
5. Z. Ali, M. Mehmood, J. Ahmed, A. Majeed and K. H. Thebo, *Mater Lett*, 2020, **259**, 126831
6. R. K. V. Prataap and S. Mohan, *Chem Commun*, 2017, **53**, 3365-3368.
7. D. Xiang, X. J. Bo, X. H. Gao, C. M. Zhang, C. Du, F. Q. Zheng, Z. H. Zhuang, P. Li, L. D. Zhu and W. Chen, *J Power Sources*, 2019, **438**, 226988
8. U. Y. Qazi, C. Z. Yuan, N. Ullah, Y. F. Jiang, M. Imran, A. Zeb, S. J. Zhao, R. Javaid and A. W. Xu, *Acs Appl Mater Inter*, 2017, **9**, 28627-28634.
9. Y. Liu, J. Li, F. Li, W. Z. Li, H. D. Yang, X. Y. Zhang, Y. S. Liu and J. T. Ma, *J Mater Chem A*, 2016, **4**, 4472-4478.
10. X. T. Han, C. Yu, J. Yang, C. T. Zhao, H. W. Huang, Z. B. Liu, P. M. Ajayan and J. S. Qiu, *Adv Mater Interfaces*, 2016, **3**, 1500782
11. Z. W. Gao, T. Ma, X. M. Chen, H. Liu, L. Cui, S. Z. Qiao, J. Yang and X. W. Du, *Small*, 2018, **14**, 1800195
12. H. F. Wang, C. Tang, B. Wang, B. Q. Li and Q. Zhang, *Adv Mater*, 2017, **29**, 1702327.
13. R. Liu, Y. Y. Wang, D. D. Liu, Y. Q. Zou and S. Y. Wang, *Adv Mater*, 2017, **29**, 1701546
14. Y. Y. Wang, Y. Q. Zhang, Z. J. Liu, C. Xie, S. Feng, D. D. Liu, M. F. Shao and S. Y. Wang, *Angew Chem Int Edit*, 2017, **56**, 5867-5871.
15. W. Liu, H. Liu, L. N. Dang, H. X. Zhang, X. L. Wu, B. Yang, Z. J. Li, X. W. Zhang, L. C. Lei and S. Jin, *Adv Funct Mater*, 2017, **27**, 1603904
16. Y. Y. Wang, C. Xie, Z. Y. Zhang, D. D. Liu, R. Chen and S. Y. Wang, *Adv Funct Mater*, 2018, **28**, 1703363
